# Supplementary material
Source: Research Square preprint supplement (doi:10.21203/rs.3.rs-9390086/v1)
Supplement: Supplementary file 1 [file a011015367548f608e4bc547.docx]

**Highlights**

- Seeking to regenerate the polluted urban landscapes which are usually abandoned sites posing numerous environmental, social, and economic challenges within urban areas
- Proposing a post-industrial site museum design for post-industrial landscapes through a comprehensive environmental conservation approach
- Executing site decontamination, environmental remediation, conservation, and restoration of the existing valuable industrial structures
- Modification of post-industrial landscapes to protect and present their heritage values while contributing to the sustainability of their ecosystemic structure
